# Supplementary material for: Integrative Analysis and Validation of a Cancer-associated Fibroblasts Senescence-related Signature for Risk Stratification and Therapeutic Prediction in Esophageal Squamous Cell Carcinoma
Source: PubMed Central journal article supplement (PMC11414623; doi:10.7150/jca.100430), 2024-09-09
Supplement: jcav15p5742s1.pdf [file jcav15p5742s1.pdf]

## Supplementary figure

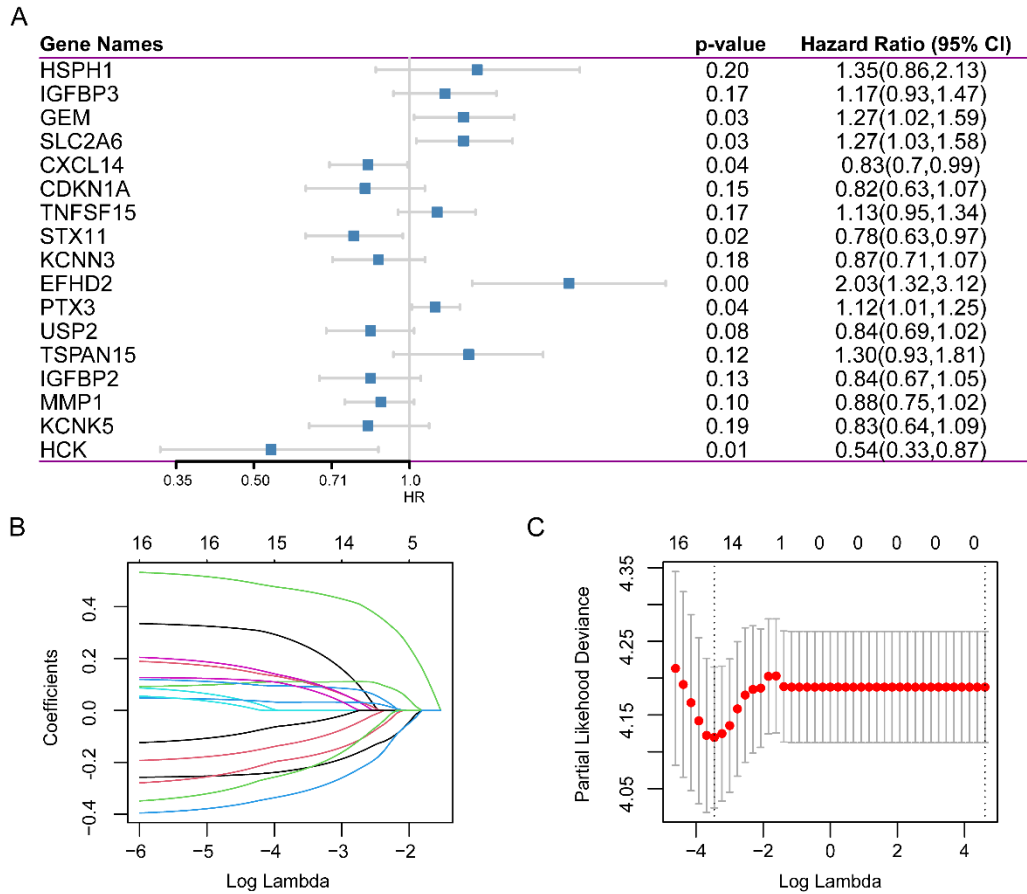

**Figure S1.** Identification of prognostic genes. **(A)** The univariate Cox analysis screened 17 prognostic CAFs senescence-related genes. **(B)** The LASSO regression analysis. **(C)** The partial likelihood deviance of the signature.

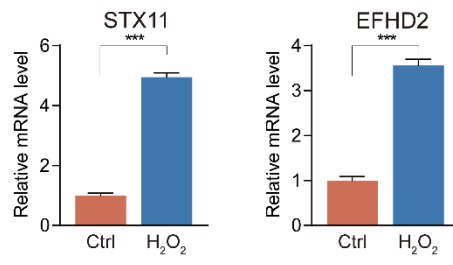

**Figure S2.** qRT-PCR analysis of the expression of *STX11* and *EFHD2* in control and H<sub>2</sub>O<sub>2</sub>-treated MRC-5 cells. \*\*\*,  $p < 0.001$ .
